# Supplementary material
Source: PubMed Central journal article supplement (PMC7002110)
Supplement: NIHMS1527345-supplement-2.pdf [file NIHMS1527345-supplement-2.pdf]

**Supplementary Table 1 (Statistical Results)**

| Figure | Description                                                            | Test              | Statistic                                                                        | p value                                                                                                                                                                                                                                                              | Number of samples                                                                      | Multiple comparisons correction            |
|--------|------------------------------------------------------------------------|-------------------|----------------------------------------------------------------------------------|----------------------------------------------------------------------------------------------------------------------------------------------------------------------------------------------------------------------------------------------------------------------|----------------------------------------------------------------------------------------|--------------------------------------------|
| Fig 1l | AP axis                                                                | One-way ANOVA     | F(8, 4451) =13.56                                                                | One tailed $p < 10^{-10}$                                                                                                                                                                                                                                            | 4460 neurons (excludes animal with cannula implant around lens, Materials and Methods) | Benjamini-Hochberg (BH) FDR for all 3 axes |
| Fig 1l | ML axis                                                                | One-way ANOVA     | F(8, 4451) =14.82                                                                | One tailed $p < 10^{-10}$                                                                                                                                                                                                                                            | 4460 neurons                                                                           | BH for all 3 axes                          |
| Fig 1l | DV axis                                                                | One-way ANOVA     | F(8, 4451) =16.94                                                                | One tailed $p < 10^{-10}$                                                                                                                                                                                                                                            | 4460 neurons                                                                           | BH for all 3 axes                          |
| Fig 2e | Difference in Onset t scores between CS+ and CS- trials during Day 1   | One sample t test | t for all clusters = (2.26, -3.10, 1.78, -1.58, 1.56, 0.69, 2.81, -0.83, 1.50)   | Two-tailed p values per cluster = ( $7.44 \times 10^{-02}$ , $2.30 \times 10^{-02}$ , $1.75 \times 10^{-01}$ , $1.75 \times 10^{-01}$ , $1.75 \times 10^{-01}$ , $4.90 \times 10^{-01}$ , $2.49 \times 10^{-02}$ , $4.56 \times 10^{-01}$ , $1.75 \times 10^{-01}$ ) | Number of neurons per cluster = (187, 92, 130, 137, 172, 171, 174, 214, 158)           | BH correction across clusters              |
| Fig 2e | Difference in Trace t scores between CS+ and CS- trials during Day 1   | One sample t test | t for all clusters = (-1.05, -0.11, 3.52, 1.82, 2.59, -0.86, 0.77, -1.66, -0.52) | Two-tailed p values per cluster = ( $5.32 \times 10^{-01}$ , $9.15 \times 10^{-01}$ , $5.42 \times 10^{-03}$ , $2.11 \times 10^{-01}$ , $4.64 \times 10^{-02}$ , $5.66 \times 10^{-01}$ , $5.66 \times 10^{-01}$ , $2.20 \times 10^{-01}$ , $6.76 \times 10^{-01}$ ) | Number of neurons per cluster = (187, 92, 130, 137, 172, 171, 174, 214, 158)           | BH correction across clusters              |
| Fig 2e | Difference in Onset t scores between CS+ and CS- trials during Trained | One sample t test | t for all clusters = (9.45, 2.16, -1.53, -2.14, -3.26, -1.19, 1.98, 0.72, -1.68) | Two-tailed p values per cluster = ( $1.34 \times 10^{-16}$ , $7.60 \times 10^{-02}$ , $1.65 \times 10^{-01}$ , $7.60 \times 10^{-02}$ , $5.97 \times 10^{-03}$ , $2.65 \times 10^{-01}$ , $8.90 \times 10^{-02}$ , $4.70 \times 10^{-01}$ , $1.42 \times 10^{-01}$ ) | Number of neurons per cluster = (187, 92, 130, 137, 172, 171, 174, 214, 158)           | BH correction across clusters              |
| Fig 2e | Difference in Trace t scores between CS+ and CS- trials during Trained | One sample t test | t for all clusters = (8.59, 7.09, 0.09, 0.13, 6.70, 2.37, 4.91, 0.23, -1.78)     | Two-tailed p values per cluster = ( $3.08 \times 10^{-14}$ , $8.91 \times 10^{-10}$ , $9.29 \times 10^{-01}$ , $9.29 \times 10^{-01}$ , $8.91 \times 10^{-10}$ , $3.38 \times 10^{-02}$ ,                                                                            | Number of neurons per cluster = (187, 92, 130, 137, 172, 171, 174, 214, 158)           | BH correction across clusters              |

|        |                                                                                                         |                             |                                                                                                     |                                                                                                                                                                                                                                                                      |                                                                                     |                                                                                                                                                                                                               |
|--------|---------------------------------------------------------------------------------------------------------|-----------------------------|-----------------------------------------------------------------------------------------------------|----------------------------------------------------------------------------------------------------------------------------------------------------------------------------------------------------------------------------------------------------------------------|-------------------------------------------------------------------------------------|---------------------------------------------------------------------------------------------------------------------------------------------------------------------------------------------------------------|
|        |                                                                                                         |                             |                                                                                                     | $4.61 \times 10^{-06}$ ,<br>$9.29 \times 10^{-01}$ ,<br>$1.15 \times 10^{-01}$ )                                                                                                                                                                                     |                                                                                     |                                                                                                                                                                                                               |
| Fig 2h | Test for performance of groups on the day that the best group reached peak performance (Methods)        | Bootstrap test (Methods)    | See Figure for means of all groups                                                                  | Two-tailed p value for eNpHR3.0 onset versus control = 0.028, eNpHR3.0 trace versus control = 0.77                                                                                                                                                                   | Number of animals in eNpHR3.0 onset = 11, eNpHR3.0 trace = 12, mCherry control = 11 | BH for two comparisons correction                                                                                                                                                                             |
| Fig 2h | Test for mean performance difference between experimental and control groups on non-test days (Methods) | One sample t test (Methods) | t(6) = -5.68 for eNpHR3.0 onset versus control<br><br>t(6) = 1.02 for eNpHR3.0 trace versus control | Two-tailed p value for eNpHR3.0 onset versus control = 0.0026, eNpHR3.0 trace versus control = 0.35                                                                                                                                                                  | Number of sessions used for comparisons = 7 in both cases                           | BH for two comparisons correction                                                                                                                                                                             |
| Fig 3c | Fractional split difference between OFC-CaMKII and OFC-VTA                                              | Chi-squared test            | $\chi^2(8) = 82.42$                                                                                 | One-tailed p value = $1.59 \times 10^{-14}$                                                                                                                                                                                                                          | Number of neurons OFC-CaMKII = 4813, OFC-VTA = 526                                  | N/A                                                                                                                                                                                                           |
| Fig 3g | Test for performance of groups on the day that the best group reached peak performance (Methods)        | Bootstrap test (Methods)    | See Figure for means of all groups                                                                  | Two-tailed p value for eNpHR3.0 onset versus control = 0.94, eNpHR3.0 trace versus control = 0.24                                                                                                                                                                    | Number of animals in eNpHR3.0 onset = 8, eNpHR3.0 trace = 7, mCherry control = 7    | BH for two comparisons correction                                                                                                                                                                             |
| Fig 4b | Test for significant mean slope for OFC-CaMKII                                                          | Wilcoxon signed-rank test   | W for all clusters = (811, 418, 4144, 4716, 3387, 2207, 7068, 8819, 5117)                           | Two-tailed p values per cluster = ( $9.14 \times 10^{-26}$ , $3.72 \times 10^{-10}$ , $1.43 \times 10^{+01}$ , $1.77 \times 10^{+01}$ , $1.05 \times 10^{-08}$ , $3.72 \times 10^{-14}$ , $7.44 \times 10^{+00}$ , $5.55 \times 10^{-02}$ , $7.81 \times 10^{-01}$ ) | Number of neurons per cluster = (187, 92, 130, 137, 172, 171, 174, 214, 158)        | We wanted to be conservative in identifying clusters with significant learning effects. Hence, used Bonferroni correction across clusters, and Trace and Reward GLM variables (shown in Supplementary Fig 9b) |
| Fig 4b | Test for significant mean slope for OFC-VTA                                                             | Wilcoxon signed-rank test   | W for all clusters = (97, 146, 38, 634, 420, 358)                                                   | Two-tailed p values per cluster = ( $2.15 \times 10^{-02}$ , $9.03 \times 10^{-01}$ , $2.06 \times 10^{-03}$ , $4.20 \times 10^{+00}$ , $3.25 \times 10^{+00}$ , $5.82 \times 10^{+00}$ )                                                                            | Number of neurons per cluster = (32, 30, 28, 54, 45, 40)                            | Bonferroni correction across clusters, and Trace and Reward GLM variables                                                                                                                                     |
| Fig 5g | Test for mean optimal lag in OFC-CaMKII neurons across                                                  | One sample t test           | t = -1.60 for cluster 1 for Onset.                                                                  | Two-tailed p values per cluster = $1.23 \times 10^{-01}$ for                                                                                                                                                                                                         | Number of neurons per cluster = (187, 92, 172, 171)                                 | BH correction across clusters, and Onset, Trace ad                                                                                                                                                            |

|           |                                                                                       |                                                                   |                                                                                 |                                                                                                                                                                                           |                                                                     |                                                                                                |
|-----------|---------------------------------------------------------------------------------------|-------------------------------------------------------------------|---------------------------------------------------------------------------------|-------------------------------------------------------------------------------------------------------------------------------------------------------------------------------------------|---------------------------------------------------------------------|------------------------------------------------------------------------------------------------|
|           | the learning-related clusters                                                         |                                                                   | $t = (-2.67, 4.67, 2.93, 1.10)$ for clusters 1, 2, 5 and 6 for Trace            | cluster 1 for Onset.<br>Two-tailed p values per cluster = $(1.46 \times 10^{-02}, 1.16 \times 10^{-04}, 1.05 \times 10^{-02}, 2.73 \times 10^{-01})$ for clusters 1, 2, 5 and 6 for Trace | for clusters 1, 2, 5 and 6                                          | Reward GLM variables (Supplementary Fig 9c)                                                    |
| Fig 5g    | Test for mean optimal lag in OFC-VTA neurons across the learning-related clusters     | One sample t test                                                 | $t = 2.45$ for cluster 1 for Onset.<br>$t = (-0.15, 1.97)$ for clusters 1 and 5 | Two-tailed p values per cluster = $1.22 \times 10^{-01}$ for cluster 1 for Onset.<br>Two-tailed p values per cluster = $(8.89 \times 10^{-01}, 1.78 \times 10^{-01})$                     | Number of neurons per cluster = (32, 28) for clusters 1 and 5       | BH correction across clusters, and Onset, Trace ad Reward GLM variables (Supplementary Fig 9c) |
| Fig 6d, f | OFC-CaMKII and OFC-VTA                                                                | See Supp Fig 10 results                                           | See Supp Fig 10 results                                                         | See Supp Fig 10 results                                                                                                                                                                   | See Supp Fig 10 results                                             | See Supp Fig 10 results                                                                        |
| Fig 7f    | OFC-CaMKII and OFC-VTA                                                                | See Supp Fig 13b results                                          | See Supp Fig 13b results                                                        | See Fig Supp 13b results                                                                                                                                                                  | See Fig Supp 13b results                                            | See Fig Supp 13b results                                                                       |
| Fig 8a    | eNpHR3.0 vs mCherry of Laser-PreLaser behavioral performance during cue inhibition    | Welch's t test                                                    | $t = 0.73$                                                                      | Two-tailed p value = 0.47                                                                                                                                                                 | Number of experimental animals = 18, number of control animals = 10 | N/A                                                                                            |
| Fig 8a    | eNpHR3.0 vs mCherry of Laser-PreLaser behavioral performance during reward inhibition | Welch's t test                                                    | $t = -0.22$                                                                     | Two-tailed p value = 0.83                                                                                                                                                                 | Number of experimental animals = 18, number of control animals = 10 | N/A                                                                                            |
| Fig 8b    | Previously rewarded trials versus previously unrewarded trials                        | t-test                                                            | $t = 4.91$                                                                      | Two-tailed p value = $1.12 \times 10^{-06}$                                                                                                                                               | n=14 sessions from n=7 mice                                         | N/A                                                                                            |
| Fig 8e    | Laser during cue                                                                      | Welch's t test                                                    | $t = -1.26$                                                                     | Two-tailed p value = 0.23                                                                                                                                                                 | Number of experimental animals = 18, number of control animals = 10 | N/A                                                                                            |
| Fig 8e    | Laser during reward                                                                   | Welch's t test                                                    | $t = -2.77$                                                                     | Two-tailed p value = 0.011                                                                                                                                                                | Number of experimental animals = 18, number of control animals = 10 | N/A                                                                                            |
| Fig 8g    | Pre-extinction                                                                        | Welch's t test for eNpHR3.0 experimental animals compared against | $t = 0.52$                                                                      | Two-tailed p value = 0.61                                                                                                                                                                 | Number of experimental animals = 15, number of control animals = 6  | N/A                                                                                            |

|             |                                                                                        |                                                                                         |                                                                                     |                                                                                                                                                                                                                                                                      |                                                                               |                                              |
|-------------|----------------------------------------------------------------------------------------|-----------------------------------------------------------------------------------------|-------------------------------------------------------------------------------------|----------------------------------------------------------------------------------------------------------------------------------------------------------------------------------------------------------------------------------------------------------------------|-------------------------------------------------------------------------------|----------------------------------------------|
|             |                                                                                        | mCherry/eYFP controls                                                                   |                                                                                     |                                                                                                                                                                                                                                                                      |                                                                               |                                              |
| Fig 8g      | Extinction                                                                             | Welch's t test for eNpHR3.0 experimental animals compared against mCherry/eYFP controls | Early t = 2.55, Late t = 0.98                                                       | Two-tailed p values = (0.043, 0.34)                                                                                                                                                                                                                                  | Number of experimental animals = 15, number of control animals = 6            | BH correction for early and late comparisons |
| Fig 8g      | Extinction recall                                                                      | Welch's t test for eNpHR3.0 experimental animals compared against mCherry/eYFP controls | t = 3.08                                                                            | Two-tailed p value = 0.008                                                                                                                                                                                                                                           | Number of experimental animals = 15, number of control animals = 6            | N/A                                          |
| Supp Fig 6b | CS+ Onset Day 1; all recorded cells on Day 1 across all animals                        | One-sample t test each for 9 clusters                                                   | t values per cluster = (4.81, 4.61, 8.33, 3.03, 5.86, 5.07, 3.99, 2.16, 3.17)       | Two-tailed p values per cluster = ( $6.27 \times 10^{-06}$ , $2.36 \times 10^{-05}$ , $6.03 \times 10^{-13}$ , $3.83 \times 10^{-03}$ , $6.87 \times 10^{-08}$ , $2.30 \times 10^{-06}$ , $1.54 \times 10^{-04}$ , $3.91 \times 10^{-02}$ , $2.45 \times 10^{-03}$ ) | Number of neurons per cluster = (202, 96, 137, 150, 190, 179, 201, 245, 190)  | BH across all clusters and variables         |
| Supp Fig 6b | CS+ Onset Trained; all recorded cells in a trained state across all planes and animals | One-sample t test each for 9 clusters                                                   | t values per cluster = (21.21, 19.29, 19.31, 8.21, 9.78, 10.00, 4.87, 1.79, 1.95)   | Two-tailed p values per cluster = ( $1.49 \times 10^{-69}$ , $3.02 \times 10^{-60}$ , $2.42 \times 10^{-61}$ , $2.97 \times 10^{-15}$ , $3.51 \times 10^{-20}$ , $6.36 \times 10^{-21}$ , $2.13 \times 10^{-06}$ , $8.07 \times 10^{-02}$ , $5.87 \times 10^{-02}$ ) | Number of neurons per cluster = (476, 461, 499, 580, 422, 424, 606, 699, 646) | BH across all clusters and variables         |
| Supp Fig 6b | CS- Onset Day 1; all recorded cells on Day 1 across all animals                        | One-sample t test each for 9 clusters                                                   | t values per cluster = (2.65, 4.95, 5.86, 4.40, 4.97, 5.49, 2.05, 2.56, 1.82)       | Two-tailed p values per cluster = ( $1.15 \times 10^{-02}$ , $6.58 \times 10^{-06}$ , $1.02 \times 10^{-07}$ , $3.50 \times 10^{-05}$ , $3.20 \times 10^{-06}$ , $3.52 \times 10^{-07}$ , $4.89 \times 10^{-02}$ , $1.39 \times 10^{-02}$ , $7.96 \times 10^{-02}$ ) | Number of neurons per cluster = (202, 96, 137, 150, 190, 179, 201, 245, 190)  | BH across all clusters and variables         |
| Supp Fig 6b | CS- Onset Trained; all recorded cells in a trained state across all planes and animals | One-sample t test each for 9 clusters                                                   | t values per cluster = (13.66, 16.49, 26.25, 8.20, 12.57, 9.80, -0.15, -0.84, 5.12) | Two-tailed p values per cluster = ( $1.52 \times 10^{-35}$ , $1.33 \times 10^{-47}$ , $1.18 \times 10^{-94}$ , $3.18 \times 10^{-15}$ , $1.70 \times 10^{-30}$ ,                                                                                                     | Number of neurons per cluster = (476, 461, 499, 580, 422, 424, 606, 699, 646) | BH across all clusters and variables         |

|             |                                                                                        |                                       |                                                                                       |                                                                                                                                                                                                                                                                     |                                                                               |                                      |
|-------------|----------------------------------------------------------------------------------------|---------------------------------------|---------------------------------------------------------------------------------------|---------------------------------------------------------------------------------------------------------------------------------------------------------------------------------------------------------------------------------------------------------------------|-------------------------------------------------------------------------------|--------------------------------------|
|             |                                                                                        |                                       |                                                                                       | 3.08×10 <sup>-20</sup> ,<br>8.78×10 <sup>-01</sup> ,<br>4.06×10 <sup>-01</sup> ,<br>6.41×10 <sup>-7</sup> )                                                                                                                                                         |                                                                               |                                      |
| Supp Fig 6b | CS+ Trace Day 1; all recorded cells on Day 1 across all animals                        | One-sample t test each for 9 clusters | t values per cluster = (-4.69, -1.00, -1.07, -1.73, 1.58, -5.97, -1.61, -3.29, -3.73) | Two-tailed p values per cluster = (9.85×10 <sup>-06</sup> , 3.27×10 <sup>-01</sup> , 3.01×10 <sup>-01</sup> , 9.56×10 <sup>-02</sup> , 1.24×10 <sup>-01</sup> , 4.44×10 <sup>-08</sup> , 1.17×10 <sup>-01</sup> , 1.64×10 <sup>-03</sup> , 3.90×10 <sup>-04</sup> ) | Number of neurons per cluster = (202, 96, 137, 150, 190, 179, 201, 245, 190)  | BH across all clusters and variables |
| Supp Fig 6b | CS+ Trace Trained; all recorded cells in a trained state across all planes and animals | One-sample t test each for 9 clusters | t values per cluster = (16.46, 19.34, -13.46, 2.41, 10.44, 7.64, -1.85, -5.13, -3.62) | Two-tailed p values per cluster = (9.68×10 <sup>-48</sup> , 2.09×10 <sup>-60</sup> , 6.25×10 <sup>-35</sup> , 1.99×10 <sup>-02</sup> , 2.05×10 <sup>-22</sup> , 2.77×10 <sup>-13</sup> , 7.36×10 <sup>-02</sup> , 6.12×10 <sup>-07</sup> , 4.42×10 <sup>-04</sup> ) | Number of neurons per cluster = (476, 461, 499, 580, 422, 424, 606, 699, 646) | BH across all clusters and variables |
| Supp Fig 6b | CS- Trace Day 1; all recorded cells on Day 1 across all animals                        | One-sample t test each for 9 clusters | t values per cluster = (-3.72, -0.74, -6.62, -3.75, -2.14, -3.73, 2.02, 1.03, -2.12)  | Two-tailed p values per cluster = (3.90×10 <sup>-04</sup> , 4.59×10 <sup>-01</sup> , 3.19×10 <sup>-09</sup> , 3.90×10 <sup>-04</sup> , 4.10×10 <sup>-02</sup> , 3.92×10 <sup>-04</sup> , 5.16×10 <sup>-02</sup> , 3.16×10 <sup>-01</sup> , 4.19×10 <sup>-02</sup> ) | Number of neurons per cluster = (202, 96, 137, 150, 190, 179, 201, 245, 190)  | BH across all clusters and variables |
| Supp Fig 6b | CS- Trace Trained; all recorded cells in a trained state across all planes and animals | One-sample t test each for 9 clusters | t values per cluster = (7.34, -5.59, -9.82, -2.70, 1.84, 2.39, -16.79, -4.41, 5.15)   | Two-tailed p values per cluster = (1.72×10 <sup>-12</sup> , 6.51×10 <sup>-08</sup> , 1.42×10 <sup>-20</sup> , 8.88×10 <sup>-03</sup> , 7.39×10 <sup>-02</sup> , 2.07×10 <sup>-02</sup> , 2.51×10 <sup>-51</sup> , 1.73×10 <sup>-05</sup> , 5.88×10 <sup>-07</sup> ) | Number of neurons per cluster = (476, 461, 499, 580, 422, 424, 606, 699, 646) | BH across all clusters and variables |
| Supp Fig 6b | Reward Day 1; all recorded cells on Day 1 across all animals                           | One-sample t test each for 9 clusters | t values per cluster = (8.93, 10.19, 8.09, 5.05, 11.75, 9.77, 5.59, 6.19, 5.81)       | Two-tailed p values per cluster = (2.79×10 <sup>-15</sup> , 8.22×10 <sup>-16</sup> , 2.98×10 <sup>-12</sup> , 2.88×10 <sup>-06</sup> , 8.95×10 <sup>-23</sup> , 4.10×10 <sup>-17</sup> , 2.06×10 <sup>-07</sup> ,                                                   | Number of neurons per cluster = (202, 96, 137, 150, 190, 179, 201, 245, 190)  | BH across all clusters and variables |

|             |                                                                                              |                                       |                                                                                        |                                                                                                                                                                                                                                                                      |                                                                               |                                      |
|-------------|----------------------------------------------------------------------------------------------|---------------------------------------|----------------------------------------------------------------------------------------|----------------------------------------------------------------------------------------------------------------------------------------------------------------------------------------------------------------------------------------------------------------------|-------------------------------------------------------------------------------|--------------------------------------|
|             |                                                                                              |                                       |                                                                                        | 9.13×10 <sup>-09</sup> ,<br>8.11×10 <sup>-08</sup> )                                                                                                                                                                                                                 |                                                                               |                                      |
| Supp Fig 6b | Reward Trained; all recorded cells in a trained state across all planes and animals          | One-sample t test each for 9 clusters | t values per cluster = (-4.16, 27.06, -16.47, 3.56, 17.17, 13.92, -3.59, -1.99, -1.40) | Two-tailed p values per cluster = (5.19×10 <sup>-05</sup> , 1.15×10 <sup>-95</sup> , 3.67×10 <sup>-48</sup> , 5.23×10 <sup>-04</sup> , 1.25×10 <sup>-49</sup> , 5.65×10 <sup>-36</sup> , 4.72×10 <sup>-04</sup> , 5.49×10 <sup>-02</sup> , 1.69×10 <sup>-01</sup> )  | Number of neurons per cluster = (476, 461, 499, 580, 422, 424, 606, 699, 646) | BH across all clusters and variables |
| Supp Fig 6b | Reward Late Day 1; all recorded cells on Day 1 across all animals                            | One-sample t test each for 9 clusters | t values per cluster = (10.98, 7.37, 7.25, 5.75, 8.69, 13.22, 3.19, 6.87, 6.47)        | Two-tailed p values per cluster = (5.88×10 <sup>-21</sup> , 2.76×10 <sup>-10</sup> , 1.60×10 <sup>-10</sup> , 1.41×10 <sup>-07</sup> , 1.53×10 <sup>-14</sup> , 1.87×10 <sup>-26</sup> , 2.33×10 <sup>-03</sup> , 2.52×10 <sup>-10</sup> , 3.29×10 <sup>-09</sup> )  | Number of neurons per cluster = (202, 96, 137, 150, 190, 179, 201, 245, 190)  | BH across all clusters and variables |
| Supp Fig 6b | Reward Late Trained; all recorded cells in a trained state across all planes and animals     | One-sample t test each for 9 clusters | t values per cluster = (7.36, 15.22, 5.09, 9.98, 11.19, 33.72, 0.98, 1.73, -4.27)      | Two-tailed p values per cluster = (1.50×10 <sup>-12</sup> , 5.12×10 <sup>-42</sup> , 7.76×10 <sup>-07</sup> , 2.24×10 <sup>-21</sup> , 3.63×10 <sup>-25</sup> , 3.95×10 <sup>-120</sup> , 3.38×10 <sup>-01</sup> , 8.97×10 <sup>-02</sup> , 3.23×10 <sup>-05</sup> ) | Number of neurons per cluster = (476, 461, 499, 580, 422, 424, 606, 699, 646) | BH across all clusters and variables |
| Supp Fig 6b | Lick Bout Onset Day 1; all recorded cells on Day 1 across all animals                        | One-sample t test each for 9 clusters | t values per cluster = (8.01, 4.58, 5.66, 4.47, 6.99, 5.39, 4.49, 3.36, 2.57)          | Two-tailed p values per cluster = (6.38×10 <sup>-13</sup> , 2.53×10 <sup>-05</sup> , 2.27×10 <sup>-07</sup> , 2.68×10 <sup>-05</sup> , 2.42×10 <sup>-10</sup> , 5.36×10 <sup>-07</sup> , 2.31×10 <sup>-05</sup> , 1.31×10 <sup>-03</sup> , 1.39×10 <sup>-02</sup> )  | Number of neurons per cluster = (202, 96, 137, 150, 190, 179, 201, 245, 190)  | BH across all clusters and variables |
| Supp Fig 6b | Lick Bout Onset Trained; all recorded cells in a trained state across all planes and animals | One-sample t test each for 9 clusters | t values per cluster = (16.09, 13.98, 13.72, 10.13, 10.15, 13.82, 3.35, 6.29, 2.46)    | Two-tailed p values per cluster = (4.05×10 <sup>-46</sup> , 1.26×10 <sup>-36</sup> , 5.65×10 <sup>-36</sup> , 6.70×10 <sup>-22</sup> , 2.19×10 <sup>-21</sup> , 1.40×10 <sup>-35</sup> , 1.09×10 <sup>-03</sup> , 9.81×10 <sup>-10</sup> , 1.74×10 <sup>-02</sup> )  | Number of neurons per cluster = (476, 461, 499, 580, 422, 424, 606, 699, 646) | BH across all clusters and variables |

|             |                           |                                       |                                                                                                                                               |                                                                                                                                                                                                                                                                     |                                                                              |                                      |
|-------------|---------------------------|---------------------------------------|-----------------------------------------------------------------------------------------------------------------------------------------------|---------------------------------------------------------------------------------------------------------------------------------------------------------------------------------------------------------------------------------------------------------------------|------------------------------------------------------------------------------|--------------------------------------|
| Supp Fig 6d | Decoding for each animal  | Leave one out cross validation        | R <sup>2</sup> defined as 1-(sum of squares from model/sum of squares from mean) for each animal = (0.53, -0.08, 0.35, 0.65, 0.48)            | N/A                                                                                                                                                                                                                                                                 | N/A                                                                          | N/A                                  |
| Supp Fig 6d | Cluster weights CS+ Onset | One-sample t test each for 9 clusters | t values per cluster = (6.66, 3.52, 3.05, 0.13, 2.39, -0.04, -1.35, -0.72, -0.56)                                                             | Two-tailed p values per cluster = (2.04×10 <sup>-09</sup> , 1.86×10 <sup>-03</sup> , 6.28×10 <sup>-03</sup> , 9.29×10 <sup>-01</sup> , 3.23×10 <sup>-02</sup> , 9.69×10 <sup>-01</sup> , 2.42×10 <sup>-01</sup> , 5.77×10 <sup>-01</sup> , 6.80×10 <sup>-01</sup> ) | Number of neurons per cluster = (187, 92, 130, 137, 172, 171, 174, 214, 158) | BH across all clusters and variables |
| Supp Fig 6d | Cluster weights CS+ Late  | One-sample t test each for 9 clusters | t values per cluster = (11.17, 3.66, -0.90, 0.45, 3.12, 3.46, -1.71, 2.06, 2.58)                                                              | Two-tailed p values per cluster = (4.70×10 <sup>-21</sup> , 1.43×10 <sup>-03</sup> , 4.74×10 <sup>-01</sup> , 7.37×10 <sup>-01</sup> , 5.22×10 <sup>-03</sup> , 1.86×10 <sup>-03</sup> , 1.33×10 <sup>-01</sup> , 6.87×10 <sup>-02</sup> , 2.24×10 <sup>-02</sup> ) | Number of neurons per cluster = (187, 92, 130, 137, 172, 171, 174, 214, 158) | BH across all clusters and variables |
| Supp Fig 6d | Cluster weights CS+ Trace | One-sample t test each for 9 clusters | t values per cluster = (8.19, 5.25, -3.65, -0.30, 6.88, 6.66, 1.36, 1.85, 2.55)                                                               | Two-tailed p values per cluster = (5.37×10 <sup>-13</sup> , 4.51×10 <sup>-06</sup> , 1.43×10 <sup>-03</sup> , 8.27×10 <sup>-01</sup> , 9.88×10 <sup>-10</sup> , 2.04×10 <sup>-09</sup> , 2.42×10 <sup>-01</sup> , 1.04×10 <sup>-01</sup> , 2.24×10 <sup>-02</sup> ) | Number of neurons per cluster = (187, 92, 130, 137, 172, 171, 174, 214, 158) | BH across all clusters and variables |
| Supp Fig 6e | Decoding for each animal  | Leave one out cross validation        | R <sup>2</sup> defined as 1-(sum of squares from model/sum of squares from mean) for each animal = (0.78, 0.45, 0.24, 0.16, 0.06, 0.57, 0.76) | N/A                                                                                                                                                                                                                                                                 | N/A                                                                          | N/A                                  |
| Supp Fig 6e | Cluster weights CS+ Onset | One-sample t test each for 9 clusters | t values per cluster = (3.08, 0.22, 1.04, -0.92, -2.10, -0.38)                                                                                | Two-tailed p values per cluster = (2.55×10 <sup>-02</sup> , 8.25×10 <sup>-01</sup> , 5.02×10 <sup>-01</sup> ,                                                                                                                                                       | Number of neurons per cluster = (33, 30, 28, 54, 45, 40)                     | BH across all clusters and variables |

|             |                                                                          |                                       |                                                                |                                                                                                                                                                                           |                                                                     |                                                                 |
|-------------|--------------------------------------------------------------------------|---------------------------------------|----------------------------------------------------------------|-------------------------------------------------------------------------------------------------------------------------------------------------------------------------------------------|---------------------------------------------------------------------|-----------------------------------------------------------------|
|             |                                                                          |                                       |                                                                | $5.35 \times 10^{-01}$ ,<br>$1.32 \times 10^{-01}$ ,<br>$7.72 \times 10^{-01}$ )                                                                                                          |                                                                     |                                                                 |
| Supp Fig 6e | Cluster weights CS+ Late                                                 | One-sample t test each for 9 clusters | t values per cluster = (5.24, -2.11, 2.61, -0.56, -1.99, 1.47) | Two-tailed p values per cluster = ( $1.78 \times 10^{-04}$ , $1.32 \times 10^{-01}$ , $6.57 \times 10^{-02}$ , $7.26 \times 10^{-01}$ , $1.36 \times 10^{-01}$ , $2.70 \times 10^{-01}$ ) | Number of neurons per cluster = (33, 30, 28, 54, 45, 40)            | BH across all clusters and variables                            |
| Supp Fig 6e | Cluster weights CS+ Trace                                                | One-sample t test each for 9 clusters | t values per cluster = (3.69, 0.35, 1.86, -1.73, -0.52, -0.88) | Two-tailed p values per cluster = ( $7.43 \times 10^{-03}$ , $7.72 \times 10^{-01}$ , $1.67 \times 10^{-01}$ , $1.77 \times 10^{-01}$ , $7.26 \times 10^{-01}$ , $5.35 \times 10^{-01}$ ) | Number of neurons per cluster = (33, 30, 28, 54, 45, 40)            | BH across all clusters and variables                            |
| Supp Fig 7e | OFC-CaMKII: Onset vs Control of Laser-PreLaser behavioral performance    | Welch's t test                        | t = 0.10                                                       | Two-tailed p value = 0.92                                                                                                                                                                 | Number of experimental animals = 7, number of control animals = 7   | These null results are prior to correction.                     |
| Supp Fig 7e | OFC-CaMKII: Trace vs Control of Laser-PreLaser behavioral performance    | Welch's t test                        | t = -0.10                                                      | Two-tailed p value = 0.92                                                                                                                                                                 | Number of experimental animals = 8, number of control animals = 7   | These null results are prior to correction.                     |
| Supp Fig 7e | OFC-VTA: Onset vs Control of Laser-PreLaser behavioral performance       | Welch's t test                        | t = -0.88                                                      | Two-tailed p value = 0.40                                                                                                                                                                 | Number of experimental animals = 8, number of control animals = 6   | These null results are prior to correction.                     |
| Supp Fig 7e | OFC-VTA: Trace vs Control of Laser-PreLaser behavioral performance       | Welch's t test                        | t = -0.29                                                      | Two-tailed p value = 0.78                                                                                                                                                                 | Number of experimental animals = 7, number of control animals = 6   | These null results are prior to correction.                     |
| Supp Fig 7f | OFC-CaMKII: eNpHR3.0 vs mCherry of Laser-PreLaser behavioral performance | Welch's t test                        | t = 1.54                                                       | Two-tailed p value = 0.14                                                                                                                                                                 | Number of experimental animals = 15, number of control animals = 7  | These null results are prior to correction.                     |
| Supp Fig 7f | OFC-VTA: eNpHR3.0 vs mCherry of Laser-PreLaser behavioral performance    | Welch's t test                        | t = -1.48                                                      | Two-tailed p value = 0.16                                                                                                                                                                 | Number of experimental animals = 18, number of control animals = 10 | These null results are prior to correction.                     |
| Supp Fig 9b | Test for significant mean slope for OFC-CaMKII                           | Wilcoxon signed-rank test             | W for all clusters = (622, 1813, 341, 2621, 6688,              | Two-tailed p values per cluster = ( $5.55 \times 10^{-27}$ , $3.68 \times 10^{+00}$ ,                                                                                                     | Number of neurons per cluster = (187, 92, 130, 137,                 | Bonferroni correction across clusters, and Trace and Reward GLM |



|              |                                                                                      |                           |                                                                                   |                                                                                                                                                                                                                                                                      |                                                                                                                                                  |                                                                                                   |
|--------------|--------------------------------------------------------------------------------------|---------------------------|-----------------------------------------------------------------------------------|----------------------------------------------------------------------------------------------------------------------------------------------------------------------------------------------------------------------------------------------------------------------|--------------------------------------------------------------------------------------------------------------------------------------------------|---------------------------------------------------------------------------------------------------|
|              |                                                                                      |                           | 6717, 2678, 6450, 3009)                                                           | $1.62 \times 10^{-18}$ ,<br>$1.09 \times 10^{-04}$ ,<br>$4.52 \times 10^{+00}$ ,<br>$5.88 \times 10^{+00}$ ,<br>$2.18 \times 10^{-12}$ ,<br>$4.55 \times 10^{-07}$ ,<br>$2.43 \times 10^{-07}$ )                                                                     | 172, 171, 174, 214, 158)                                                                                                                         | variables (see results in Fig 4b).                                                                |
| Supp Fig 9b  | Test for significant mean slope for OFC-VTA                                          | Wilcoxon signed-rank test | W for all clusters = (89, 140, 172, 337, 359, 176)                                | Two-tailed p values per cluster = ( $1.28 \times 10^{-02}$ , $6.85 \times 10^{-01}$ , $5.76 \times 10^{+00}$ , $5.77 \times 10^{-03}$ , $8.83 \times 10^{-01}$ , $1.99 \times 10^{-02}$ )                                                                            | Number of neurons per cluster = (32, 30, 28, 54, 45, 40)                                                                                         | Bonferroni correction across clusters, and Trace and Reward GLM variables (see results in Fig 4b) |
| Supp Fig 9c  | Test for mean optimal lag in OFC-CaMKII neurons across the learning-related clusters | One sample t test         | t = (-3.72, -2.80, 2.64, 1.74, 3.62, 2.26) for clusters 1, 3, 4, 7, 8 and 9       | Two-tailed p values per cluster = ( $1.36 \times 10^{-03}$ , $1.31 \times 10^{-02}$ , $1.46 \times 10^{-02}$ , $1.02 \times 10^{-01}$ , $1.36 \times 10^{-03}$ , $3.43 \times 10^{-02}$ )                                                                            | Number of neurons per cluster = (187, 130, 137, 174, 214, 158)                                                                                   | BH correction across clusters, and Onset, Trace ad Reward GLM variables (see results in Fig 5g)   |
| Supp Fig 9c  | Test for mean optimal lag in OFC-VTA neurons across the learning-related clusters    | One sample t test         | t = (-1.23, 0.50, 0.14) for clusters 1, 7 and 9                                   | Two-tailed p values per cluster = ( $4.54 \times 10^{-01}$ , $8.89 \times 10^{-01}$ , $8.89 \times 10^{-01}$ )                                                                                                                                                       | Number of neurons per cluster = (32, 54, 40)                                                                                                     | BH correction across clusters, and Onset, Trace ad Reward GLM variables (Fig 5g)                  |
| Supp Fig 10a | 50%-Trained Trace                                                                    | One sample t-test         | t values per cluster = (-1.37, -7.94, 8.77, -1.29, -1.46, 0.92, 2.25, 5.73, 2.05) | Two-tailed p values per cluster = ( $2.22 \times 10^{-01}$ , $7.25 \times 10^{-14}$ , $2.56 \times 10^{-16}$ , $2.24 \times 10^{-01}$ , $2.17 \times 10^{-01}$ , $3.60 \times 10^{-01}$ , $5.58 \times 10^{-02}$ , $4.42 \times 10^{-08}$ , $7.28 \times 10^{-02}$ ) | Number of neurons per cluster (470, 458, 497, 572, 416, 423, 596, 693, 638)                                                                      | BH across all clusters                                                                            |
| Supp Fig 10a | Background-after Background Trace                                                    | One sample t-test         | t values per cluster = (-0.96, 0.39, 3.27, -0.77, -2.52, -2.81, 2.66, 0.42, 0.87) | Two-tailed p values per cluster = ( $5.69 \times 10^{-01}$ , $6.94 \times 10^{-01}$ , $1.21 \times 10^{-02}$ , $5.69 \times 10^{-01}$ , $2.80 \times 10^{-02}$ , $2.50 \times 10^{-02}$ , $2.56 \times 10^{-02}$ , $6.94 \times 10^{-01}$ , $5.69 \times 10^{-01}$ ) | Number of neurons per cluster (196, 94, 138, 151, 193, 178, 204, 242, 191)<br><br>Not all planes of cells were imaged during Background sessions | BH across all clusters                                                                            |
| Supp Fig 10a | 50%-Trained Onset                                                                    | One sample t-test         | t values per cluster = (-1.59, -0.35, -3.22, 2.62, 3.86, 2.33, 2.71, 3.22, 3.25)  | Two-tailed p values per cluster = ( $1.25 \times 10^{-01}$ , $7.29 \times 10^{-01}$ , $3.08 \times 10^{-03}$ ,                                                                                                                                                       | Number of neurons per cluster (470, 458, 497, 572, 416, 423, 596, 693, 638)                                                                      | BH across all clusters                                                                            |

|              |                                   |                   |                                                                                    |                                                                                                                                                                                                                                                                      |                                                                                                                                                  |                        |
|--------------|-----------------------------------|-------------------|------------------------------------------------------------------------------------|----------------------------------------------------------------------------------------------------------------------------------------------------------------------------------------------------------------------------------------------------------------------|--------------------------------------------------------------------------------------------------------------------------------------------------|------------------------|
|              |                                   |                   |                                                                                    | $1.36 \times 10^{-02}$ ,<br>$1.19 \times 10^{-03}$ ,<br>$2.58 \times 10^{-02}$ ,<br>$1.25 \times 10^{-02}$ ,<br>$3.08 \times 10^{-03}$ ,<br>$3.08 \times 10^{-03}$                                                                                                   |                                                                                                                                                  |                        |
| Supp Fig 10a | Background-after Background Onset | One sample t-test | t values per cluster = (-4.49, 2.53, -2.90, -1.38, -2.11, -4.40, 0.77, 0.73, 0.45) | Two-tailed p values per cluster = ( $8.46 \times 10^{-05}$ , $2.98 \times 10^{-02}$ , $1.30 \times 10^{-02}$ , $2.53 \times 10^{-01}$ , $6.48 \times 10^{-02}$ , $8.46 \times 10^{-05}$ , $5.21 \times 10^{-01}$ , $5.21 \times 10^{-01}$ , $6.51 \times 10^{-01}$ ) | Number of neurons per cluster (196, 94, 138, 151, 193, 178, 204, 242, 191)<br><br>Not all planes of cells were imaged during Background sessions | BH across all clusters |
| Supp Fig 10b | 50%-Trained Trace                 | One sample t-test | t values per cluster = (-1.25, 0.14, -0.08, 1.61, 1.62, 0.51)                      | Two-tailed p values per cluster = ( $4.34 \times 10^{-01}$ , $9.37 \times 10^{-01}$ , $9.37 \times 10^{-01}$ , $3.36 \times 10^{-01}$ , $3.36 \times 10^{-01}$ , $9.15 \times 10^{-01}$ )                                                                            | Number of neurons per cluster (66, 78, 45, 88, 89, 87)                                                                                           | BH across all clusters |
| Supp Fig 10b | Background-after Background Trace | One sample t-test | t values per cluster = (-0.09, -0.65, -0.62, 1.81, -0.24, 2.45)                    | Two-tailed p values per cluster = ( $9.30 \times 10^{-01}$ , $8.14 \times 10^{-01}$ , $8.14 \times 10^{-01}$ , $2.33 \times 10^{-01}$ , $9.30 \times 10^{-01}$ , $1.14 \times 10^{-01}$ )                                                                            | Number of neurons per cluster (28, 27, 24, 45, 42, 39)<br><br>Not all planes of cells were imaged during Background sessions                     | BH across all clusters |
| Supp Fig 10b | 50%-Trained Onset                 | One sample t-test | t values per cluster = (-0.93, -0.58, 1.85, 0.64, 2.20, -0.74)                     | Two-tailed p values per cluster = ( $5.66 \times 10^{-01}$ , $5.66 \times 10^{-01}$ , $2.13 \times 10^{-01}$ , $5.66 \times 10^{-01}$ , $1.83 \times 10^{-01}$ , $5.66 \times 10^{-01}$ )                                                                            | Number of neurons per cluster (66, 78, 45, 88, 89, 87)                                                                                           | BH across all clusters |
| Supp Fig 10b | Background-after Background Onset | One sample t-test | t values per cluster = (-0.57, -0.71, -2.04, 1.42, -0.53, 0.81)                    | Two-tailed p values per cluster = ( $6.02 \times 10^{-01}$ , $6.02 \times 10^{-01}$ , $3.15 \times 10^{-01}$ , $4.89 \times 10^{-01}$ , $6.02 \times 10^{-01}$ , $6.02 \times 10^{-01}$ )                                                                            | Number of neurons per cluster (28, 27, 24, 45, 42, 39)<br><br>Not all planes of cells were imaged during Background sessions                     | BH across all clusters |
| Supp Fig 11a | See Figure                        | Two-sample t test | t = 7.20                                                                           | Two-tailed p value = $1.14 \times 10^{-12}$                                                                                                                                                                                                                          | n=20 sessions from a total of n=5 mice                                                                                                           | N/A                    |
| Supp Fig 11b | See Figure                        | One sample t-test | t values per cluster = (-0.26, 1.26, -6.76, -                                      | Two-tailed p values per cluster =                                                                                                                                                                                                                                    | Number of neurons per cluster (470,                                                                                                              | BH across all clusters |

|              |                                                   |                       |                                                                                  |                                                                                                                                                                                                                                                                      |                                                                               |                        |
|--------------|---------------------------------------------------|-----------------------|----------------------------------------------------------------------------------|----------------------------------------------------------------------------------------------------------------------------------------------------------------------------------------------------------------------------------------------------------------------|-------------------------------------------------------------------------------|------------------------|
|              |                                                   |                       | 0.45, 1.88, 0.42, -2.01, -2.81, 0.84)                                            | ( $7.96 \times 10^{-01}$ , $3.76 \times 10^{-01}$ , $3.52 \times 10^{-10}$ , $7.58 \times 10^{-01}$ , $1.37 \times 10^{-01}$ , $7.58 \times 10^{-01}$ , $1.35 \times 10^{-01}$ , $2.26 \times 10^{-02}$ , $6.05 \times 10^{-01}$ )                                   | 458, 497, 571, 415, 423, 596, 692, 636)                                       |                        |
| Supp Fig 11c | See Figure (Reproduced from Supplementary Fig 6b) | One sample t-test     | t values for clusters 3 and 8 = (-13.46, -5.13)                                  | Two-tailed p values for clusters 3 and 8 = ( $5.95 \times 10^{-35}$ , $5.68 \times 10^{-07}$ )                                                                                                                                                                       | Number of neurons in clusters 3 and 8 = (499, 699)                            | BH across all clusters |
| Supp Fig 11d | See Figure                                        | One sample t-test     | t values for clusters 3 and 8 = (8.66, 3.41)                                     | Two-tailed p values for clusters 3 and 8 = ( $2.01 \times 10^{-16}$ , $1.04 \times 10^{-03}$ )                                                                                                                                                                       | Number of neurons in clusters 3 and 8 = (497, 692)                            | BH across all clusters |
| Supp Fig 11e | See Figure                                        | One sample t-test     | t values for clusters 3 and 8 = (9.58, 2.88)                                     | Two-tailed p values for clusters 3 and 8 = ( $2.02 \times 10^{-19}$ , $5.24 \times 10^{-03}$ )                                                                                                                                                                       | Number of neurons in clusters 3 and 8 = (497, 692)                            | BH across all clusters |
| Supp Fig 11g | See Figure                                        | Pearson's correlation | See Figure                                                                       | Two-tailed p values for clusters 3 and 8 = ( $5.85 \times 10^{-01}$ , $8.31 \times 10^{-01}$ )                                                                                                                                                                       | Number of neurons in clusters 3 and 8 = (130, 213)                            | BH across all clusters |
| Supp Fig 12a | Reward Omission                                   | One sample t-test     | t values per cluster = (7.56, 9.81, 4.76, 5.20, 5.62, 9.84, 2.21, 1.36, 1.31)    | Two-tailed p values per cluster = ( $6.43 \times 10^{-13}$ , $4.84 \times 10^{-20}$ , $3.82 \times 10^{-06}$ , $4.93 \times 10^{-07}$ , $7.96 \times 10^{-08}$ , $4.84 \times 10^{-20}$ , $3.51 \times 10^{-02}$ , $1.90 \times 10^{-01}$ , $1.90 \times 10^{-01}$ ) | Number of neurons per cluster = (470, 458, 497, 572, 416, 423, 596, 693, 638) | BH across all clusters |
| Supp Fig 12a | Reward Receipt                                    | One sample t-test     | t values per cluster = (4.66, 11.44, -0.08, 4.43, 9.11, 6.97, 1.80, 0.57, 1.12)  | Two-tailed p values per cluster = ( $9.28 \times 10^{-06}$ , $7.27 \times 10^{-26}$ , $9.37 \times 10^{-01}$ , $2.01 \times 10^{-05}$ , $1.62 \times 10^{-17}$ , $3.74 \times 10^{-11}$ , $1.09 \times 10^{-01}$ , $6.38 \times 10^{-01}$ , $3.39 \times 10^{-01}$ ) | Number of neurons per cluster = (470, 458, 497, 572, 416, 423, 596, 693, 638) | BH across all clusters |
| Supp Fig 12b | Reward Omission Late                              | One sample t-test     | t values per cluster = (5.06, -3.36, 3.31, 4.00, 2.79, 5.15, -0.67, 1.24, -0.44) | Two-tailed p values per cluster = ( $2.71 \times 10^{-06}$ , $1.82 \times 10^{-03}$ , $1.82 \times 10^{-03}$ , $2.15 \times 10^{-04}$ , $8.16 \times 10^{-03}$ , $2.71 \times 10^{-06}$ ,                                                                            | Number of neurons per cluster = (470, 458, 497, 572, 416, 423, 596, 693, 638) | BH across all clusters |

|              |                             |                   |                                                                                       |                                                                                                                                                                                                                                                                     |                                                                               |                        |
|--------------|-----------------------------|-------------------|---------------------------------------------------------------------------------------|---------------------------------------------------------------------------------------------------------------------------------------------------------------------------------------------------------------------------------------------------------------------|-------------------------------------------------------------------------------|------------------------|
|              |                             |                   |                                                                                       | 5.64×10 <sup>-01</sup> ,<br>2.76×10 <sup>-01</sup> ,<br>6.63×10 <sup>-01</sup> )                                                                                                                                                                                    |                                                                               |                        |
| Supp Fig 12b | Reward Receipt Late         | One sample t-test | t values per cluster = (5.97, 6.93, 2.64, 5.73, 3.87, 10.89, 0.39, -1.92, -0.03)      | Two-tailed p values per cluster = (1.42×10 <sup>-08</sup> , 6.65×10 <sup>-11</sup> , 1.28×10 <sup>-02</sup> , 3.57×10 <sup>-08</sup> , 2.31×10 <sup>-04</sup> , 1.46×10 <sup>-23</sup> , 7.80×10 <sup>-01</sup> , 7.17×10 <sup>-02</sup> , 9.76×10 <sup>-01</sup> ) | Number of neurons per cluster = (470, 458, 497, 572, 416, 423, 596, 693, 638) | BH across all clusters |
| Supp Fig 12c | Omission minus Receipt      | One sample t-test | t values per cluster = (2.89, -4.81, 4.15, -0.72, -6.66, 2.06, 0.10, 0.52, 0.03)      | Two-tailed p values per cluster = (9.11×10 <sup>-03</sup> , 9.23×10 <sup>-06</sup> , 1.17×10 <sup>-04</sup> , 7.09×10 <sup>-01</sup> , 8.02×10 <sup>-10</sup> , 7.25×10 <sup>-02</sup> , 9.76×10 <sup>-01</sup> , 7.74×10 <sup>-01</sup> , 9.76×10 <sup>-01</sup> ) | Number of neurons per cluster = (470, 458, 497, 572, 416, 423, 596, 693, 638) | BH across all clusters |
| Supp Fig 12c | Omission minus Receipt Late | One sample t-test | t values per cluster = (-2.25, -7.88, -0.16, -2.46, -2.12, -6.64, -0.93, 2.47, -0.26) | Two-tailed p values per cluster = (4.50×10 <sup>-02</sup> , 2.13×10 <sup>-13</sup> , 8.70×10 <sup>-01</sup> , 3.21×10 <sup>-02</sup> , 5.13×10 <sup>-02</sup> , 4.43×10 <sup>-10</sup> , 4.54×10 <sup>-01</sup> , 3.21×10 <sup>-02</sup> , 8.70×10 <sup>-01</sup> ) | Number of neurons per cluster = (470, 458, 497, 572, 416, 423, 596, 693, 638) | BH across all clusters |
| Supp Fig 12d | Reward Omission             | One sample t-test | t values per cluster = (1.82, 0.48, 1.63, -1.09, -1.48, -0.06)                        | Two-tailed p values per cluster = (2.84×10 <sup>-01</sup> , 7.55×10 <sup>-01</sup> , 2.84×10 <sup>-01</sup> , 4.21×10 <sup>-01</sup> , 2.84×10 <sup>-01</sup> , 9.54×10 <sup>-01</sup> )                                                                            | Number of neurons per cluster = (67, 78, 46, 89, 89, 87)                      | BH across all clusters |
| Supp Fig 12d | Reward Receipt              | One sample t-test | t values per cluster = (0.72, 1.52, 3.96, 0.87, -0.81, 0.55)                          | Two-tailed p values per cluster = (5.71×10 <sup>-01</sup> , 3.96×10 <sup>-01</sup> , 1.61×10 <sup>-03</sup> , 5.71×10 <sup>-01</sup> , 5.71×10 <sup>-01</sup> , 5.81×10 <sup>-01</sup> )                                                                            | Number of neurons per cluster = (67, 78, 46, 89, 89, 87)                      | BH across all clusters |
| Supp Fig 12e | Reward Omission Late        | One sample t-test | t values per cluster = (0.75, 2.70, 0.66, -0.70, -0.92, -0.86)                        | Two-tailed p values per cluster = (5.12×10 <sup>-01</sup> , 5.06×10 <sup>-02</sup> ,                                                                                                                                                                                | Number of neurons per cluster = (67, 78, 46, 89, 89, 87)                      | BH across all clusters |

|              |                             |                            |                                                                  |                                                                                                                                                                                          |                                                          |                                                                                                                                              |
|--------------|-----------------------------|----------------------------|------------------------------------------------------------------|------------------------------------------------------------------------------------------------------------------------------------------------------------------------------------------|----------------------------------------------------------|----------------------------------------------------------------------------------------------------------------------------------------------|
|              |                             |                            |                                                                  | 5.12×10 <sup>-01</sup> ,<br>5.12×10 <sup>-01</sup> ,<br>5.12×10 <sup>-01</sup> ,<br>5.12×10 <sup>-01</sup> )                                                                             |                                                          |                                                                                                                                              |
| Supp Fig 12e | Reward Receipt Late         | One sample t-test          | t values per cluster = (1.95, 2.33, 2.29, 0.89, -1.58, 0.64)     | Two-tailed p values per cluster = (1.10×10 <sup>-01</sup> , 8.12×10 <sup>-02</sup> , 8.12×10 <sup>-02</sup> , 4.51×10 <sup>-01</sup> , 1.78×10 <sup>-01</sup> , 5.25×10 <sup>-01</sup> ) | Number of neurons per cluster = (67, 78, 46, 89, 89, 87) | BH across all clusters                                                                                                                       |
| Supp Fig 12f | Omission minus Receipt      | One sample t-test          | t values per cluster = (0.45, -1.70, -3.24, -1.35, -0.37, -0.67) | Two-tailed p values per cluster = (7.12×10 <sup>-01</sup> , 2.78×10 <sup>-01</sup> , 1.35×10 <sup>-02</sup> , 3.61×10 <sup>-01</sup> , 7.12×10 <sup>-01</sup> , 7.12×10 <sup>-01</sup> ) | Number of neurons per cluster = (67, 78, 46, 89, 89, 87) | BH across all clusters                                                                                                                       |
| Supp Fig 12f | Omission minus Receipt Late | One sample t-test          | t values per cluster = (-1.10, -0.33, -1.57, -1.05, 0.48, -1.21) | Two-tailed p values per cluster = (4.46×10 <sup>-01</sup> , 7.45×10 <sup>-01</sup> , 4.46×10 <sup>-01</sup> , 4.46×10 <sup>-01</sup> , 7.45×10 <sup>-01</sup> , 4.46×10 <sup>-01</sup> ) | Number of neurons per cluster = (67, 78, 46, 89, 89, 87) | BH across all clusters                                                                                                                       |
| Supp Fig 13b | OFC-CaMKII Cluster 1        | Permutation test (Methods) | See Figure for decoding accuracies of all groups                 | First day of extinction p < 0.0015<br>Last day of extinction p = 0.015<br>Reinstatement p < 0.0015                                                                                       | n = 184 tracked neurons                                  | BH across all test sessions. We did not correct across clusters here since each individual learning-related cluster is of interest by itself |
| Supp Fig 13b | OFC-CaMKII Cluster 2        | Permutation test           | See Figure for decoding accuracies of all groups                 | First day of extinction p = 0.026<br>Last day of extinction p = 0.083<br>Reinstatement p = 0.026                                                                                         | n = 89 tracked neurons                                   | BH across all test sessions.                                                                                                                 |
| Supp Fig 13b | OFC-CaMKII Cluster 5        | Permutation test           | See Figure for decoding accuracies of all groups                 | First day of extinction p < 0.001<br>Last day of extinction p < 0.001<br>Reinstatement p < 0.001                                                                                         | n = 169 tracked neurons                                  | BH across all test sessions.                                                                                                                 |
| Supp Fig 13b | OFC-CaMKII Cluster 6        | Permutation test           | See Figure for decoding accuracies of all groups                 | First day of extinction p = 0.003                                                                                                                                                        | n = 165 tracked neurons                                  | BH across all test sessions.                                                                                                                 |

|              |                      |                  |                                                  |                                                                                                          |                           |                              |
|--------------|----------------------|------------------|--------------------------------------------------|----------------------------------------------------------------------------------------------------------|---------------------------|------------------------------|
|              |                      |                  |                                                  | Last day of extinction $p = 0.169$<br>Reinstatement $p = 0.003$                                          |                           |                              |
| Supp Fig 13b | OFC-VTA Cluster 1    | Permutation test | See Figure for decoding accuracies of all groups | First day of extinction $p < 0.001$<br>Last day of extinction $p < 0.001$<br>Reinstatement $p < 0.001$   | $n = 27$ tracked neurons  | BH across all test sessions. |
| Supp Fig 13b | OFC-VTA Cluster 5    | Permutation test | See Figure for decoding accuracies of all groups | First day of extinction $p < 0.0015$<br>Last day of extinction $p = 0.088$<br>Reinstatement $p < 0.0015$ | $n = 23$ tracked neurons  | BH across all test sessions. |
| Supp Fig 13d | OFC-CaMKII Cluster 1 | Permutation test | See Figure for decoding accuracies of all groups | First day of extinction $p = 0.003$<br>Last day of extinction $p = 0.083$<br>Reinstatement $p = 0.048$   | $n = 159$ tracked neurons | BH across all test sessions. |
| Supp Fig 13d | OFC-CaMKII Cluster 2 | Permutation test | See Figure for decoding accuracies of all groups | First day of extinction $p = 0.075$<br>Last day of extinction $p = 0.123$<br>Reinstatement $p = 0.272$   | $n = 86$ tracked neurons  | BH across all test sessions. |
| Supp Fig 13d | OFC-CaMKII Cluster 5 | Permutation test | See Figure for decoding accuracies of all groups | First day of extinction $p = 0.004$<br>Last day of extinction $p < 0.0015$<br>Reinstatement $p < 0.0015$ | $n = 131$ tracked neurons | BH across all test sessions. |
| Supp Fig 13d | OFC-CaMKII Cluster 6 | Permutation test | See Figure for decoding accuracies of all groups | First day of extinction $p = 0.006$<br>Last day of extinction $p = 0.171$<br>Reinstatement $p = 0.003$   | $n = 150$ tracked neurons | BH across all test sessions. |
| Supp Fig 13d | OFC-VTA Cluster 1    | Permutation test | See Figure for decoding accuracies of all groups | First day of extinction $p < 0.001$<br>Last day of extinction $p = < 0.001$<br>Reinstatement $p < 0.001$ | $n = 26$ tracked neurons  | BH across all test sessions. |

|              |                      |                  |                                                  |                                                                                                                                          |                         |                              |
|--------------|----------------------|------------------|--------------------------------------------------|------------------------------------------------------------------------------------------------------------------------------------------|-------------------------|------------------------------|
| Supp Fig 13d | OFC-VTA Cluster 5    | Permutation test | See Figure for decoding accuracies of all groups | First day of extinction $p < 0.0015$<br>Last day of extinction $p = 0.08$<br>Reinstatement $p < 0.0015$                                  | n = 23 tracked neurons  | BH across all test sessions. |
| Supp Fig 14b | OFC-CaMKII Cluster 1 | Permutation test | See Figure for decoding accuracies of all groups | 50% $p < 0.00167$<br>Day before Trained $p < 0.00167$<br>Day 1 $p = 0.7$<br>Background $p = 0.53$<br>After Background $p < 0.00167$      | n = 179 tracked neurons | BH across all test sessions. |
| Supp Fig 14b | OFC-CaMKII Cluster 2 | Permutation test | See Figure for decoding accuracies of all groups | 50% $p < 0.0025$<br>Day before Trained $p < 0.0025$<br>Day 1 $p = 0.438$<br>Background $p = 0.029$<br>After Background $p = 0.028$       | n = 90 tracked neurons  | BH across all test sessions. |
| Supp Fig 14b | OFC-CaMKII Cluster 5 | Permutation test | See Figure for decoding accuracies of all groups | 50% $p < 0.00167$<br>Day before Trained $p < 0.00167$<br>Day 1 $p = 0.275$<br>Background $p = 0.0725$<br>After Background $p < 0.00167$  | n = 169 tracked neurons | BH across all test sessions. |
| Supp Fig 14b | OFC-CaMKII Cluster 6 | Permutation test | See Figure for decoding accuracies of all groups | 50% $p < 0.0025$<br>Day before Trained $p < 0.0025$<br>Day 1 $p = 0.431$<br>Background $p = 0.235$<br>After Background $p = 0.0117$      | n = 165 tracked neurons | BH across all test sessions. |
| Supp Fig 14b | OFC-VTA Cluster 1    | Permutation test | See Figure for decoding accuracies of all groups | 50% $p < 0.00125$<br>Day before Trained $p < 0.00125$<br>Day 1 $p = 0.019$<br>Background $p < 0.00125$<br>After Background $p < 0.00125$ | n = 26 tracked neurons  | BH across all test sessions. |

|               |                                                                                                          |                                                                          |                                                  |                                                                                                                               |                               |                                                                   |
|---------------|----------------------------------------------------------------------------------------------------------|--------------------------------------------------------------------------|--------------------------------------------------|-------------------------------------------------------------------------------------------------------------------------------|-------------------------------|-------------------------------------------------------------------|
| Supp Fig 14b  | OFC-VTA Cluster 5                                                                                        | Permutation test                                                         | See Figure for decoding accuracies of all groups | 50% p < 0.00167<br>Day before Trained p < 0.00167<br>Day 1 p = 0.29<br>Background p = 0.00375<br>After Background p < 0.00167 | n = 24 tracked neurons        | BH across all test sessions.                                      |
| Supp. Fig 14c | OFC-CaMKII Trace Day 1 → Day 2 compared to Day before Trained → Trained                                  | Difference in z scores from Fisher's r to z transformation <sup>55</sup> | z = -7.68                                        | Two-tailed p value = $1.55 \times 10^{-14}$ (uncorrected)<br><br>$3.88 \times 10^{-14}$ (BH corrected)                        | n = 1435 neurons              | BH correction across 5 comparisons for Trace OFC-CaMKII responses |
| Supp. Fig 14c | OFC-CaMKII Trace Day 1 → Trained compared to Day before Trained → Trained                                | Steiger's test <sup>56</sup>                                             | z = -10.62                                       | Two-tailed p value = $< 10^{-100}$ (uncorrected)<br><br>$< 10^{-100}$ (BH corrected)                                          | n = 1435 neurons              | BH correction across 5 comparisons for Trace OFC-CaMKII responses |
| Supp. Fig 14c | OFC-CaMKII Trace Trained → 50% compared to Day before Trained → Trained                                  | Steiger's test <sup>56</sup>                                             | z = -4.26                                        | Two-tailed p value = $2.14 \times 10^{-05}$ (uncorrected)<br><br>$2.68 \times 10^{-05}$ (BH corrected)                        | n = 1426 neurons              | BH correction across 5 comparisons for Trace OFC-CaMKII responses |
| Supp. Fig 14c | OFC-CaMKII Trace Day before extinction → Last day of extinction compared to Day before Trained → Trained | Difference in z scores from Fisher's r to z transformation <sup>55</sup> | z = -7.18                                        | Two-tailed p value = $6.72 \times 10^{-13}$ (uncorrected)<br><br>$1.12 \times 10^{-12}$ (BH corrected)                        | n = 1408 and n = 1435 neurons | BH correction across 5 comparisons for Trace OFC-CaMKII responses |
| Supp. Fig 14c | OFC-CaMKII Trace Day before extinction → Reinstatement compared to Day before Trained → Trained          | Difference in z scores from Fisher's r to z transformation <sup>55</sup> | z = -1.18                                        | Two-tailed p value = $2.38 \times 10^{-01}$ (uncorrected)<br><br>$2.38 \times 10^{-01}$ (BH corrected)                        | n = 1408 and n = 1435 neurons | BH correction across 5 comparisons for Trace OFC-CaMKII responses |
| Supp. Fig 14c | OFC-VTA Trace Day 1 → Day 2 compared to Day before Trained → Trained                                     | Difference in z scores from Fisher's r to z transformation <sup>55</sup> | z = -5.29                                        | Two-tailed p value = $1.25 \times 10^{-07}$ (uncorrected)<br><br>$3.13 \times 10^{-07}$ (BH corrected)                        | n = 225 neurons               | BH correction across 5 comparisons for Trace OFC-VTA responses    |
| Supp. Fig 14c | OFC-VTA Trace Day 1 → Trained compared to Day before Trained → Trained                                   | Steiger's test <sup>56</sup>                                             | z = -7.01                                        | Two-tailed p value = $2.77 \times 10^{-11}$ (uncorrected)<br><br>$1.39 \times 10^{-10}$ (BH corrected)                        | n = 225 neurons               | BH correction across 5 comparisons for Trace OFC-VTA responses    |
| Supp. Fig 14c | OFC-VTA Trace Trained → 50% compared to Day                                                              | Steiger's test <sup>56</sup>                                             | z = -2.78                                        | Two-tailed p value =                                                                                                          | n = 220 neurons               | BH correction across 5 comparisons for                            |



|               |                                                                                                      |                                                                          |                                                                                  |                                                                                                                                                                                                                                                                     |                                                                                                      |                                                                                    |
|---------------|------------------------------------------------------------------------------------------------------|--------------------------------------------------------------------------|----------------------------------------------------------------------------------|---------------------------------------------------------------------------------------------------------------------------------------------------------------------------------------------------------------------------------------------------------------------|------------------------------------------------------------------------------------------------------|------------------------------------------------------------------------------------|
|               | before Trained→Trained                                                                               |                                                                          |                                                                                  | 5.89×10 <sup>-03</sup><br>(uncorrected)<br><br>7.36×10 <sup>-03</sup><br>(BH corrected)                                                                                                                                                                             |                                                                                                      | Trace OFC-VTA responses                                                            |
| Supp. Fig 14c | OFC-VTA Trace Day before extinction →Last day of extinction compared to Day before Trained→Trained   | Difference in z scores from Fisher's r to z transformation <sup>55</sup> | z = -3.27                                                                        | Two-tailed p value = 1.07×10 <sup>-03</sup><br>(uncorrected)<br><br>1.78×10 <sup>-03</sup><br>(BH corrected)                                                                                                                                                        | n = 225 and n =184 neurons                                                                           | BH correction across 5 comparisons for Trace OFC-VTA responses                     |
| Supp. Fig 14c | OFC-VTA Trace Day before extinction → Reinstatement compared to Day before Trained→Trained           | Difference in z scores from Fisher's r to z transformation <sup>55</sup> | z = -1.86                                                                        | Two-tailed p value = 6.28×10 <sup>-02</sup><br>(uncorrected)<br><br>6.28×10 <sup>-02</sup><br>(BH corrected)                                                                                                                                                        | n = 225 and n = 183 neurons                                                                          | BH correction across 5 comparisons for Trace OFC-VTA responses                     |
| Supp Fig 15a  | Mean change in lick rate between CS+ to reward/omission time vs baseline across animals              | Paired t test                                                            | t = (-1.92, -4.16) for 50% and Background versus Trained                         | Two-tailed p value = (8.33×10 <sup>-02</sup> , 3.89×10 <sup>-03</sup> )                                                                                                                                                                                             | n = 11 animals<br><br>One OFCVTA animal had no Background session and was removed from this analysis | BH correction for the 2 comparisons, viz. 50% vs Trained and Background vs Trained |
| Supp Fig 15a  | Mean lick rate during reward consumption period (0-3 s after first lick after reward) across animals | Paired t test                                                            | t = (1.07, -0.39) for 50% and Background versus Trained                          | Two-tailed p value = (6.20×10 <sup>-01</sup> , 7.04×10 <sup>-01</sup> )                                                                                                                                                                                             | n = 11 animals<br><br>One OFCVTA animal had no Background session and was removed from this analysis | BH correction for the 2 comparisons, viz. 50% vs Trained and Background vs Trained |
| Supp Fig 15a  | Mean change in lick rate between CS- to omission time vs baseline across animals                     | Paired t test                                                            | t = (-1.55, -3.52) for 50% and Background versus Trained                         | Two-tailed p value = (1.52×10 <sup>-01</sup> , 1.11×10 <sup>-02</sup> )                                                                                                                                                                                             | n = 11 animals<br><br>One OFCVTA animal had no Background session and was removed from this analysis | BH correction for the 2 comparisons, viz. 50% vs Trained and Background vs Trained |
| Supp Fig 15b  | Difference in Onset coefficients between CS+ and CS- trials on Trained session                       | One sample t test                                                        | t for all clusters = (6.99, 2.15, -1.64, -1.60, -2.91, -0.62, 0.81, 1.15, -1.99) | Two-tailed p values per cluster = (4.33×10 <sup>-10</sup> , 1.02×10 <sup>-01</sup> , 1.69×10 <sup>-01</sup> , 1.69×10 <sup>-01</sup> , 1.83×10 <sup>-02</sup> , 5.39×10 <sup>-01</sup> , 4.72×10 <sup>-01</sup> , 3.25×10 <sup>-01</sup> , 1.08×10 <sup>-01</sup> ) | Number of neurons per cluster = (187, 92, 130, 137, 172, 171, 174, 214, 158)                         | BH correction across clusters                                                      |
| Supp Fig 15b  | Difference in Trace coefficients between CS+ and CS- trials on Trained session                       | One sample t test                                                        | t for all clusters = (4.95, 5.10, 0.42, 0.44, 4.39, 2.58, 2.61, -0.10, -1.99)    | Two-tailed p values per cluster = (8.30×10 <sup>-06</sup> , 8.30×10 <sup>-06</sup> , 7.58×10 <sup>-01</sup> , 7.58×10 <sup>-01</sup> ,                                                                                                                              | Number of neurons per cluster = (187, 92, 130, 137, 172, 171, 174, 214, 158)                         | BH correction across clusters                                                      |

|              |                                                                                      |                   |                                                                                                         |                                                                                                                                                                                                                                                                  |                                                                                |                                                                         |
|--------------|--------------------------------------------------------------------------------------|-------------------|---------------------------------------------------------------------------------------------------------|------------------------------------------------------------------------------------------------------------------------------------------------------------------------------------------------------------------------------------------------------------------|--------------------------------------------------------------------------------|-------------------------------------------------------------------------|
|              |                                                                                      |                   |                                                                                                         | 5.87×10 <sup>-05</sup> ,<br>1.95×10 <sup>-02</sup> ,<br>1.95×10 <sup>-02</sup> ,<br>9.24×10 <sup>-01</sup> ,<br>7.21×10 <sup>-02</sup> )                                                                                                                         |                                                                                |                                                                         |
| Supp Fig 15d | Test for mean optimal lag in OFC-CaMKII neurons across the learning-related clusters | One sample t test | t = -1.12 for cluster 1 for Onset.<br>t = (-2.25, 4.49, 2.01 1.55) for clusters 1, 2, 5 and 6 for Trace | Two-tailed p values per cluster = 3.22×10 <sup>-01</sup> for cluster 1 for Onset.<br>Two-tailed p values per cluster = (4.69×10 <sup>-02</sup> , 2.27×10 <sup>-04</sup> , 7.29×10 <sup>-02</sup> , 1.68×10 <sup>-01</sup> ) for clusters 1, 2, 5 and 6 for Trace | Number of neurons per cluster = (187, 92, 172, 171) for clusters 1, 2, 5 and 6 | BH correction across clusters, and Onset, Trace ad Reward GLM variables |
| Supp Fig 15d | Test for mean optimal lag in OFC-VTA neurons across the learning-related clusters    | One sample t test | t = 3.56 for cluster 1 for Onset.<br>t = (0.28, 2.49) for clusters 1 and 5                              | Two-tailed p values per cluster = 7.55×10 <sup>-03</sup> for cluster 1 for Onset.<br>Two-tailed p values per cluster = (7.85×10 <sup>-01</sup> , 5.83×10 <sup>-02</sup> )                                                                                        | Number of neurons per cluster = (32, 28) for clusters 1 and 5                  | BH correction across clusters, and Onset, Trace ad Reward GLM variables |
| Supp Fig 15e | Test for mean optimal lag in OFC-CaMKII neurons across the learning-related clusters | One sample t test | t = (-2.78, -3.40, 0.85, 2.76, 3.49, 0.44) for clusters 1, 3, 4, 7, 8 and 9                             | Two-tailed p values per cluster = (1.40×10 <sup>-02</sup> , 3.35×10 <sup>-03</sup> , 4.37×10 <sup>-01</sup> , 1.40×10 <sup>-02</sup> , 3.25×10 <sup>-03</sup> , 6.63×10 <sup>-01</sup> )                                                                         | Number of neurons per cluster = (187, 130, 137, 174, 214, 158)                 | BH correction across clusters, and Onset, Trace ad Reward GLM variables |
| Supp Fig 15e | Test for mean optimal lag in OFC-VTA neurons across the learning-related clusters    | One sample t test | t = (-0.92, 1.50, -0.35) for clusters 1, 7 and 9                                                        | Two-tailed p values per cluster = (5.50×10 <sup>-01</sup> , 2.78×10 <sup>-01</sup> , 7.85×10 <sup>-01</sup> )                                                                                                                                                    | Number of neurons per cluster = (32, 54, 40)                                   | BH correction across clusters, and Onset, Trace ad Reward GLM variables |
